# Supplementary material for: A hot Jupiter around the very active weak-line T Tauri star TAP 26
Source: Oxford University Press journal article supplement (doi:10.1093/mnras/stx009), 2017-01-05
Supplement: stx009_Supplementary_Data.zip [file stx009_Supplementary_Data.zip]

Archive with 2 entries (2 files):
- diffs_2_3.pdf
- tap26_2016_sub3_online.pdf
